# Supplementary material for: New solid forms of tetrahydrocurcumin with improved solubility
Source: Royal Society of Chemistry journal article supplement (doi:10.1039/d4ce00259h), 2024-01-01
Supplement: d4ce00259h1.pdf [file d4ce00259h1.pdf]

## Supporting Information

### New Solid Forms of Tetrahydrocurcumin with Improved Solubility

*Fanyu Tian,<sup>ab</sup> Mengyuan Xia,<sup>bc</sup> Hao Wang,<sup>ab</sup> Bingrui Zhang,<sup>bc</sup> Zhenfeng Ding,<sup>bc</sup> Xiaoyi Rong,<sup>b</sup> Bingqing  
Zhu,<sup>\*b</sup> and Xuefeng Mei<sup>\*abc</sup>*

<sup>a</sup> School of Chinese Materia Medica, Nanjing University of Chinese Medicine, 138  
Xianlin Avenue, Nanjing 210023, China.

<sup>b</sup> Pharmaceutical Analytical & Solid-State Chemistry Research Center, Shanghai  
Institute of Materia Medica, Chinese Academy of Sciences, 555 Zuchongzhi Road,  
Shanghai 201203, China.

<sup>c</sup> University of Chinese Academy of Sciences, No. 19A Yuquan Road, Beijing 100049,  
China.

#### **\*Corresponding authors**

E-mail addresses: zhubingq@simm.ac.cn (B.Q. Zhu), xuefengmei@simm.ac.cn

(X.F. Mei).

**Table S1** The cofomers of curcumin cocrystals.

| NO. | Cofomer                                   | NO. | Cofomer                            |
|-----|-------------------------------------------|-----|------------------------------------|
| 1   | Resorcinol <sup>1</sup>                   | 18  | Trimesic acid <sup>2</sup>         |
| 2   | Pyrogallol <sup>1</sup>                   | 19  | Hydroxyquinol <sup>2, 3</sup>      |
| 3   | Phloroglucinol <sup>4</sup>               | 20  | Ascorbic acid <sup>5</sup>         |
| 4   | Praziquantel <sup>6</sup>                 | 21  | Cinnamic acid <sup>7</sup>         |
| 5   | 4,4'-bipyridine-N,N'-dioxide <sup>8</sup> | 22  | Resveratrol <sup>9</sup>           |
| 6   | Nicotinamide <sup>10</sup>                | 23  | 2-aminobenzimidazole <sup>11</sup> |
| 7   | Piperazine <sup>10</sup>                  | 24  | L-lysine <sup>11</sup>             |
| 8   | Isonicotinamide <sup>10</sup>             | 25  | Dextrose <sup>12</sup>             |
| 9   | Methyl paraben <sup>13</sup>              | 26  | L-proline <sup>14</sup>            |
| 10  | Piperidine <sup>10</sup>                  | 27  | 4,4'-bipyridine <sup>15</sup>      |
| 11  | Naproxen sodium <sup>10</sup>             | 28  | N-acetylcysteine <sup>16</sup>     |
| 12  | Ibuprofen sodium <sup>10</sup>            | 29  | Tryptamine <sup>17</sup>           |
| 13  | L-carnitine <sup>18</sup>                 | 30  | Piperine <sup>14</sup>             |
| 14  | Saccharin <sup>19</sup>                   | 31  | Taconic acid <sup>19</sup>         |
| 15  | Maleic acid <sup>19</sup>                 | 32  | Benzoic acid <sup>19</sup>         |
| 16  | Catechol <sup>20</sup>                    | 33  | Hydroquinone <sup>20</sup>         |
| 17  | Quercetin <sup>21</sup>                   | 34  | Isoniazid <sup>22</sup>            |

**Table S2.** Cofomers selected in cocrystal screening experiment for THC. Bold text indicates successful multicomponent crystal forms formation.

| NO. | Cofomer                | NO. | Cofomer                 |
|-----|------------------------|-----|-------------------------|
| 1   | <b>L-Proline</b>       | 14  | Nicotinamide            |
| 2   | <b>D-Proline</b>       | 15  | Isonicotinamide         |
| 3   | <b>DL-Proline</b>      | 16  | Succinic acid           |
| 4   | <b>Betaine</b>         | 17  | Adipic acid             |
| 5   | <b>4,4'-Bipyridine</b> | 18  | L-tartaric acid         |
| 6   | L-Hydroxyproline       | 19  | Citric acid monohydrate |
| 7   | Sarcosine              | 20  | L-malic acid            |
| 8   | Fat-soluble vitamin    | 21  | L-ascorbic acid         |
| 9   | Theophylline           | 22  | L-glutamic acid         |
| 10  | Theobromine            | 23  | D-malic acid            |
| 11  | Isoniazid              | 24  | Benzoic acid            |
| 12  | Vitamin B2             | 25  | Sorbic acid             |
| 13  | Caffeine               | 26  | Salicylic acid          |

**Table S3.** List of H-bond lengths and angles for THC cocrystals

| Form              | interaction | D-H/Å | H...A/ Å | D...A/ Å | ∠D-H...A/ deg | symmetry code    |
|-------------------|-------------|-------|----------|----------|---------------|------------------|
| <b>THC-L-PRO</b>  | O1-H1...O2  | 0.91  | 1.67     | 2.508(4) | 152           |                  |
|                   | N1-H1C...O7 | 0.91  | 2.20     | 3.017(4) | 150           | x,y,1+z          |
|                   | N1-H1C...O8 | 0.91  | 2.26     | 3.022(4) | 140           | x,y,1+z          |
|                   | N1-H1D...O3 | 0.91  | 2.28     | 3.086(4) | 147           | -1/2+x,3/2-y,1-z |
|                   | O4-H4...O7  | 0.84  | 1.95     | 2.707(4) | 149           | 1/2+x,3/2-y,1-z  |
|                   | O6-H6...O8  | 0.84  | 1.96     | 2.687(4) | 144           | 1/2+x,3/2-y,1-z  |
| <b>THC-D-PRO</b>  | O2-H2...O1  | 0.84  | 1.75     | 2.501(5) | 148           |                  |
|                   | N1-H1C...O7 | 0.91  | 2.37     | 3.094(6) | 137           | x,y,-1+z         |
|                   | N1-H1C...O8 | 0.91  | 2.11     | 2.951(6) | 154           | x,y,-1+z         |
|                   | N1-H1D...O5 | 0.91  | 2.23     | 3.031(6) | 147           | 1/2-x,1/2+y,1-z  |
|                   | O4-H4...O7  | 0.84  | 1.94     | 2.668(5) | 144           | 1/2-x,1/2+y,1-z  |
|                   | O6-H6...O8  | 0.84  | 1.97     | 2.703(5) | 145           | 1/2-x,-1/2+y,1-z |
| <b>THC-DL-PRO</b> | O2-H2...O1  | 0.84  | 1.75     | 2.502(4) | 148           |                  |
|                   | N2-H2C...O8 | 0.91  | 2.07     | 2.921(7) | 154           | x,-1+y,z         |
|                   | N2-H2D...O5 | 0.91  | 2.31     | 3.105(6) | 146           | x,y,-1+z         |
|                   | O4-H4...O7  | 0.84  | 1.95     | 2.692(4) | 146           | x,y,z            |
|                   | O6-H6...O8  | 0.84  | 1.95     | 2.707(4) | 149           | x,y,1+z          |
| <b>THC-BPY</b>    | O1-H1...O2  | 0.84  | 1.74     | 2.48(2)  | 145           |                  |
|                   | O4-H4...N1  | 0.85  | 2.03     | 2.81(4)  | 154           | 1+x,1+y,z        |
|                   | O6-H6...N1  | 0.84  | 2.10     | 2.74(4)  | 133           | -x,1+y,1-z       |
| <b>THC-BTN</b>    | O1-H1...O2  | 0.84  | 1.75     | 2.498(5) | 148           |                  |
|                   | O4-H4...O7  | 0.84  | 1.97     | 2.735(4) | 151           | 1-x,2-y,1-z      |
|                   | O6-H6...O8  | 0.84  | 1.78     | 2.612(5) | 173           | -x,-1/2+y,3/2-z  |

**Table S4** The melting enthalpy ( $\Delta H_m$ ) of THC and its cocrystals.

| Form       | $\Delta H_m$ (kJ/mol) |            |
|------------|-----------------------|------------|
|            | THC                   | cocrystal  |
| THC-L-PRO  |                       | 64.3 ± 4.5 |
| THC-D-PRO  |                       | 66.7 ± 1.8 |
| THC-DL-PRO | 43.6 ± 1.2            | 66.8 ± 5.4 |
| THC-BPY    |                       | 59.2 ± 0.8 |
| THC-BTN    |                       | 56.2 ± 5.6 |

**Table S5.**THC concentration of solutions at 30 min and 120 min for the powder dissolution experiment of THC-L-PRO cocrystal.

| Time    | Form             | Concentration ( $\mu\text{g/mL}$ ) |        |        |
|---------|------------------|------------------------------------|--------|--------|
|         |                  | pH 2.0                             | pH 4.5 | pH 6.8 |
| 30 min  | THC              | 47.7                               | 40.2   | 42.3   |
|         | THC-L-PRO        | 138.7                              | 79.2   | 78.0   |
|         | THC-L-PRO VS THC | 2.9                                | 2.0    | 1.8    |
| 120 min | THC              | 55.0                               | 57.2   | 42.9   |
|         | THC-L-PRO        | 139.3                              | 90.7   | 68.8   |
|         | THC-L-PRO VS THC | 2.5                                | 1.6    | 1.6    |

**Table S6.**THC concentration of solutions at 30 min and 120 min for the powder dissolution experiment of polymorphs.

| Time    | Form              | Concentration ( $\mu\text{g/mL}$ ) |        |        |
|---------|-------------------|------------------------------------|--------|--------|
|         |                   | pH 2.0                             | pH 4.5 | pH 6.8 |
| 30 min  | Form I            | 47.7                               | 40.2   | 42.3   |
|         | Form II           | 107.4                              | 83.8   | 68.8   |
|         | Form II VS Form I | 2.3                                | 2.1    | 1.6    |
| 120 min | Form I            | 55.0                               | 57.2   | 42.9   |
|         | Form II           | 66.8                               | 64.5   | 54.3   |
|         | Form II VS Form I | 1.2                                | 1.1    | 1.3    |

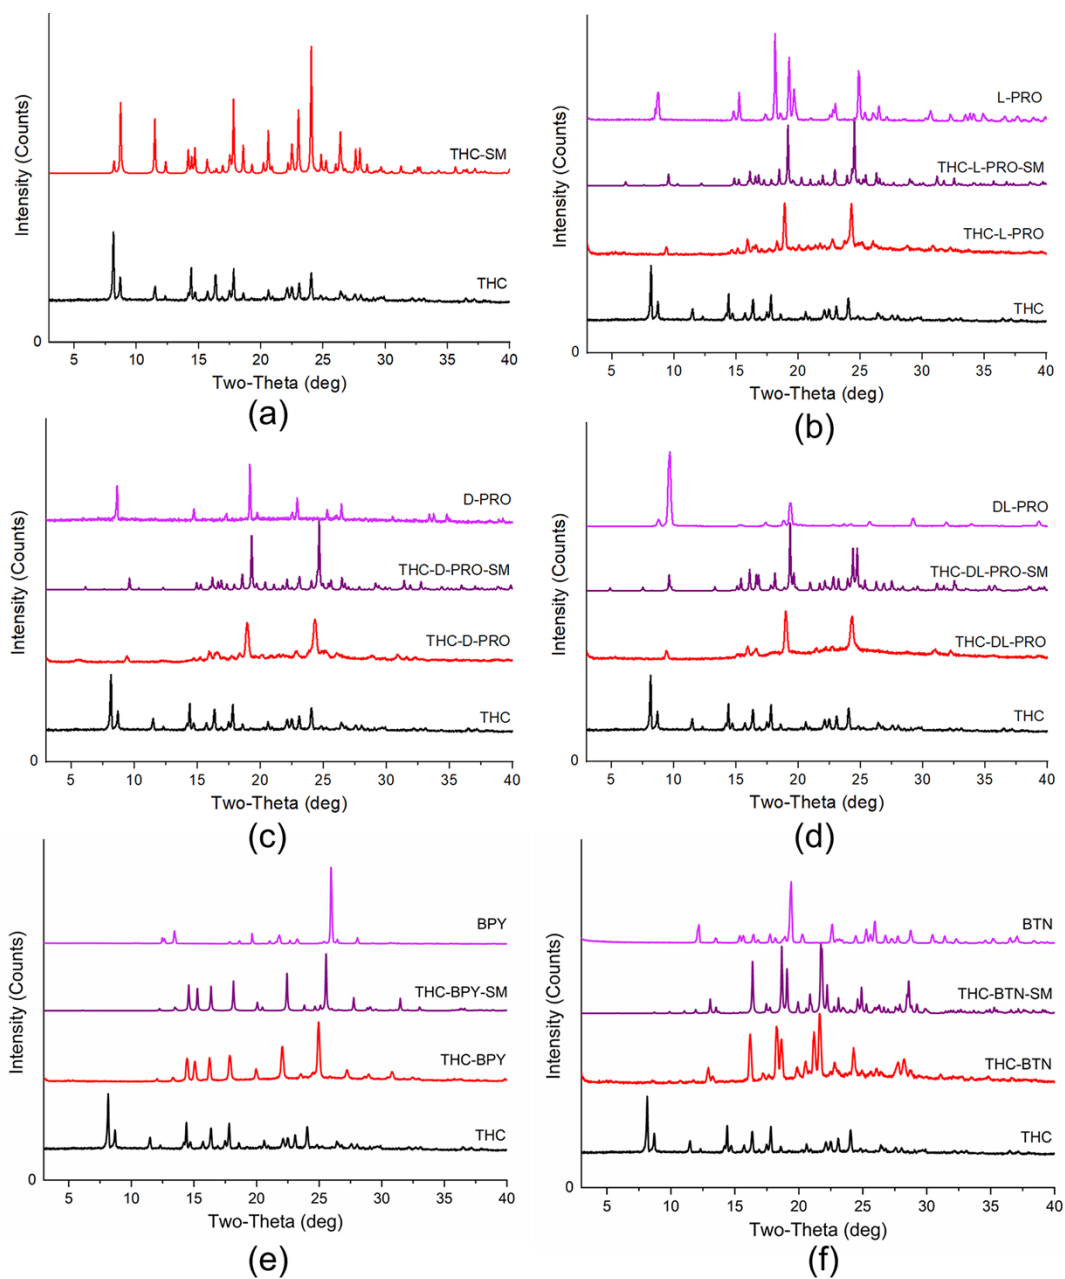

**Fig. S1.** Comparison between experimental and simulated PXPDP of THC and THC cocrystals: (a) THC, (b) THC-L-PRO, (c) THC-D-PRO, (d) THC-DL-PRO, (e) THC-BPY, and (f) THC-BTN.

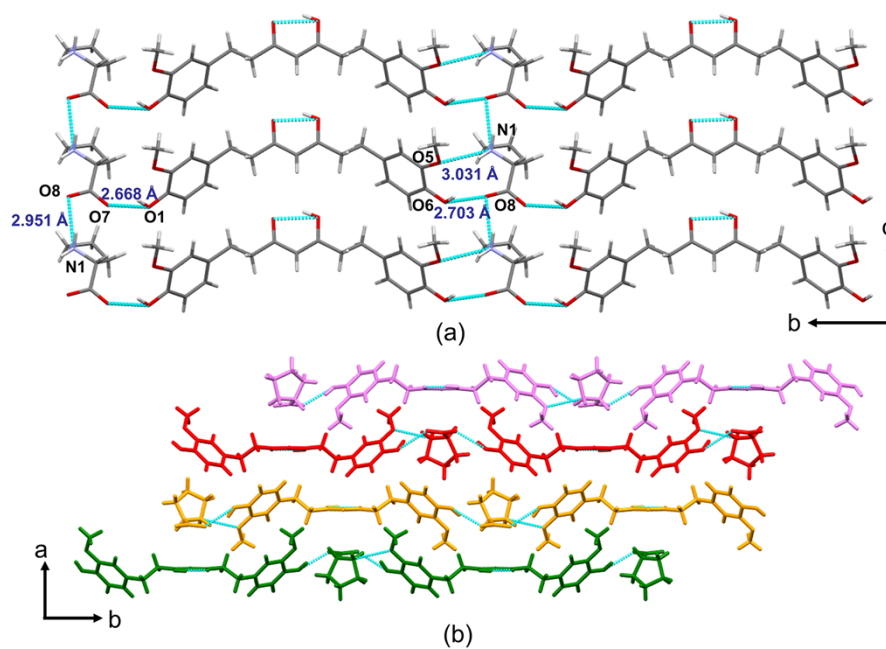

**Fig. S2.** Crystal structure of THC-D-PRO: (a) Hydrogen bonding mapping and 2D layer parallel to the  $bOc$  plane, and (b) 2D layer parallel to the  $aOb$  plane.

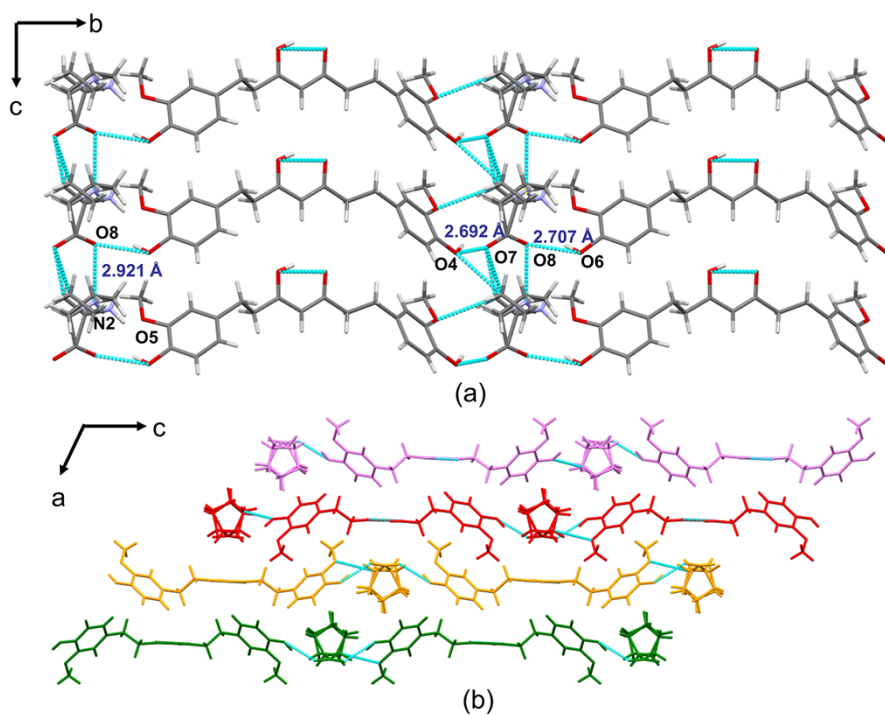

**Fig. S3.** Crystal structure of THC-DL-PRO: (a) Hydrogen bonding mapping and 2D layer parallel to the  $bOc$  plane, and (b) 2D layer parallel to the  $aOc$  plane.

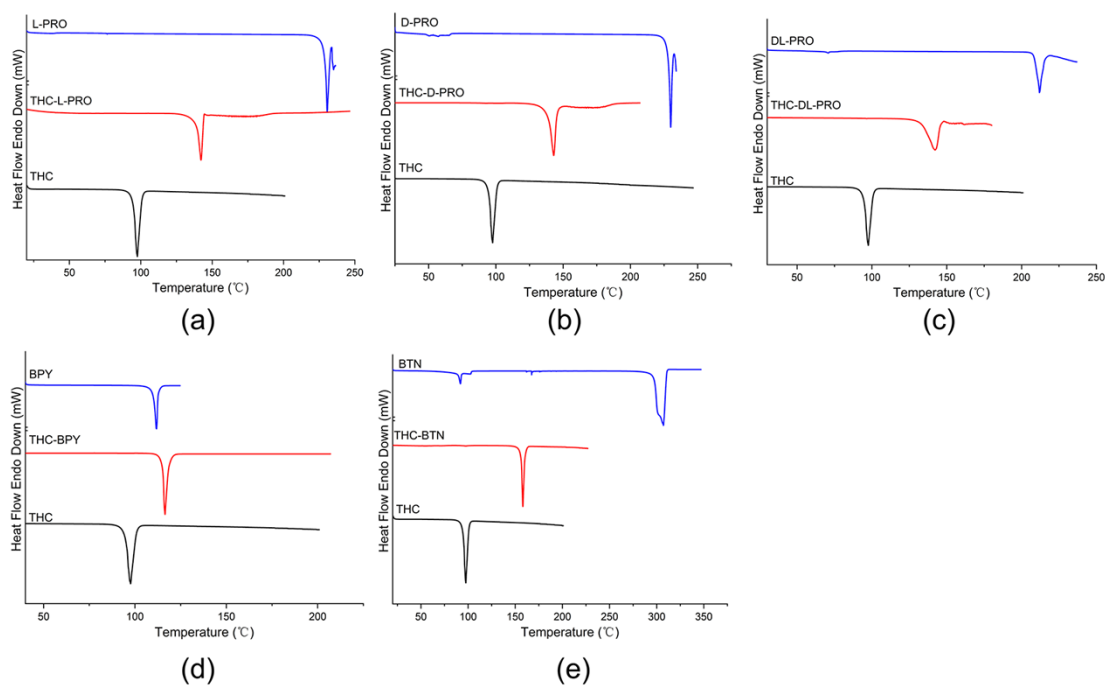

**Fig. S4.** Comparison of DSC diagrams among THC, coformers and corresponding cocrystals: (a) THC-L-PRO, (b) THC-D-PRO, (c) THC-DL-PRO, (d) THC-BPY, (e) THC-BTN.

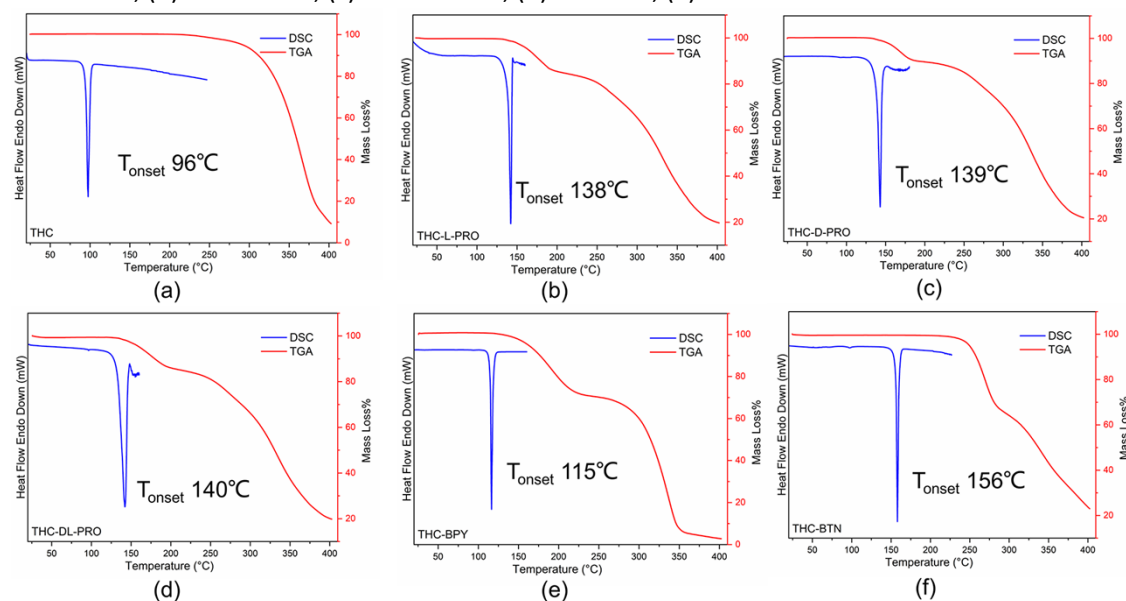

**Fig. S5** TGA-DSC profiles of (a) THC, (b) THC-L-PRO, (c) THC-D-PRO, (d) THC-DL-PRO, (e) THC-BPY and (f) THC-BTN.

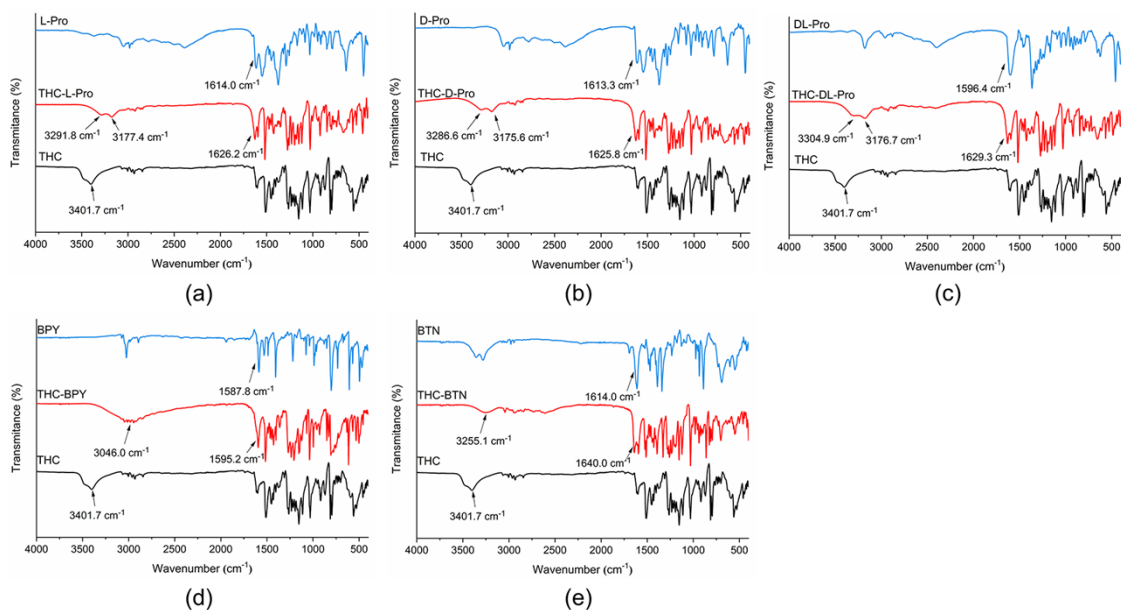

**Fig. S6.** Comparison of FT-IR profiles among THC, coformers and corresponding cocrystals: (a) THC-L-PRO, (b) THC-D-PRO, (c) THC-DL-PRO, (d) THC-BPY, (e) THC-BTN.

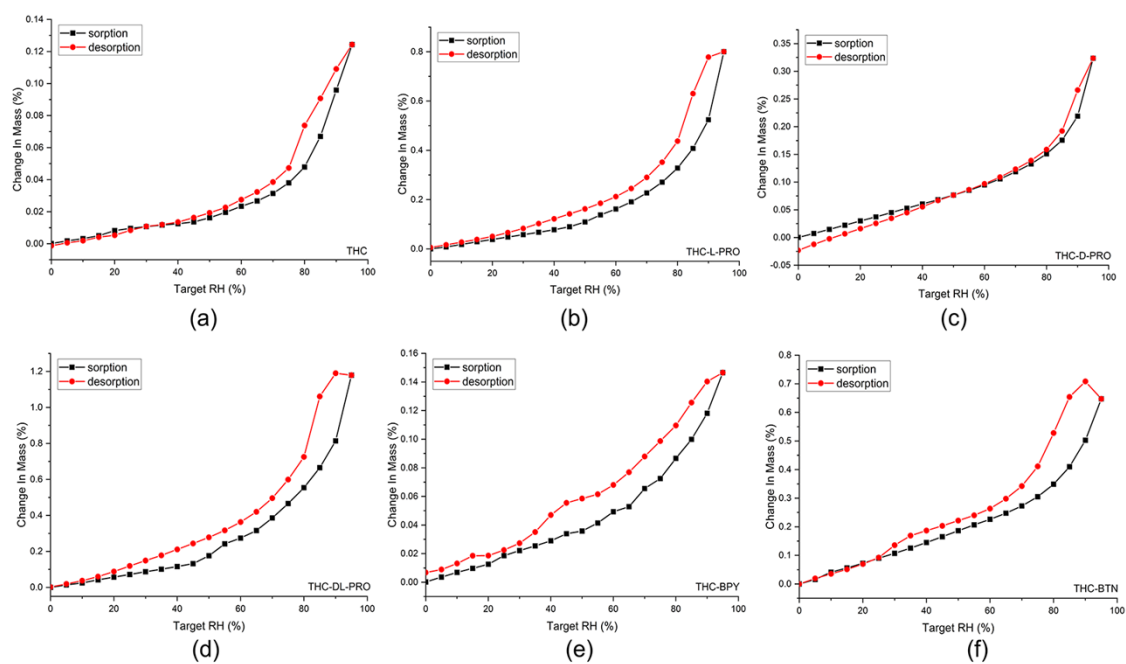

**Fig. S7.** DVS profiles of THC and THC cocrystals: (a) THC, (b) THC-L-PRO, (c) THC-D-PRO, and (d) THC-DL-PRO, (e) THC-BPY, (f) THC-BTN.



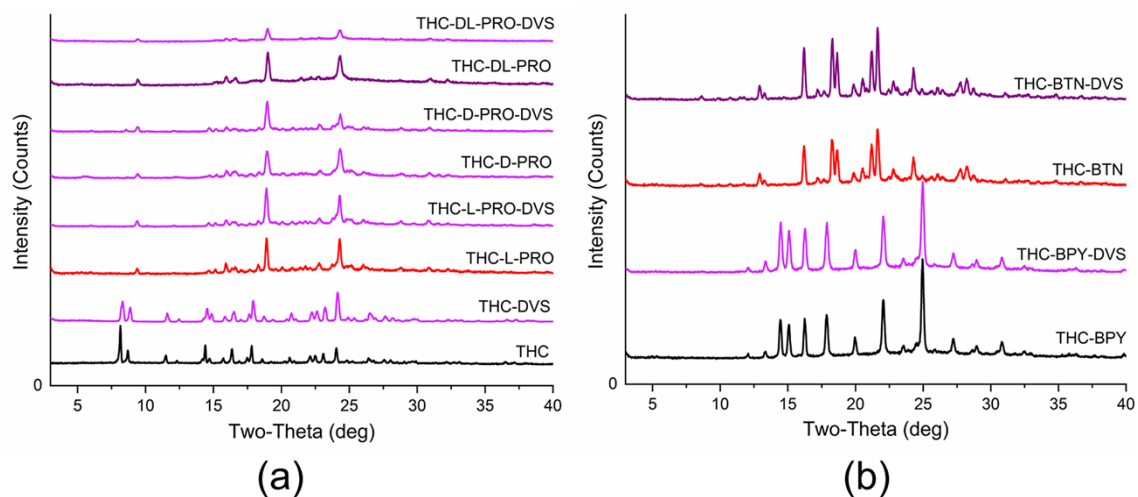

**Fig. S8.** PXRD patterns of THC and THC cocrystals after DVS experiments.

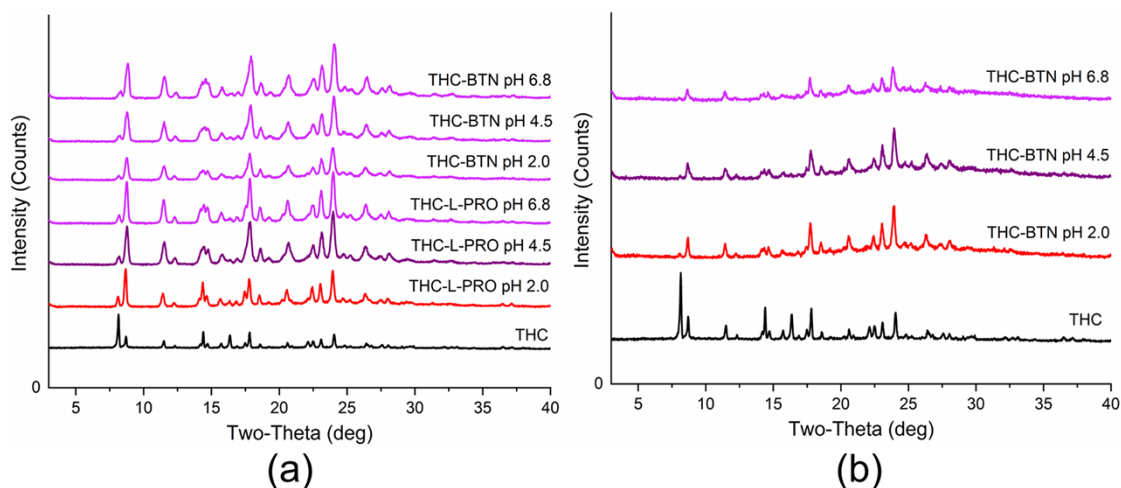

**Fig. S9.** PXRD patterns of (a) the undissolved solids after equilibrium solubility experiment and (b) the precipitates of THC-BTN from the dissolution experiments.

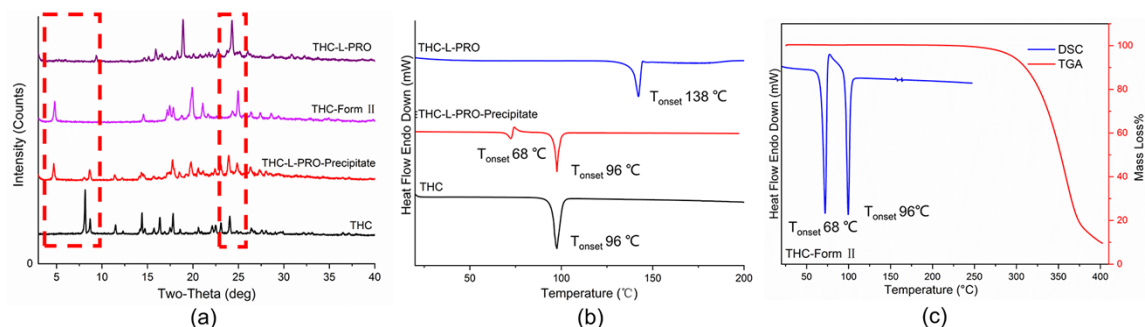

**Fig. S10.** (a) PXRD patterns of THC, the precipitate of THC-L-PRO from the dissolution experiment, THC-Form II and THC-L-PRO, (b) Comparison of DSC diagrams among THC, the precipitate of THC-L-PRO from the dissolution experiment and THC-L-PRO and (c) TGA-DSC profile of THC-Form II.

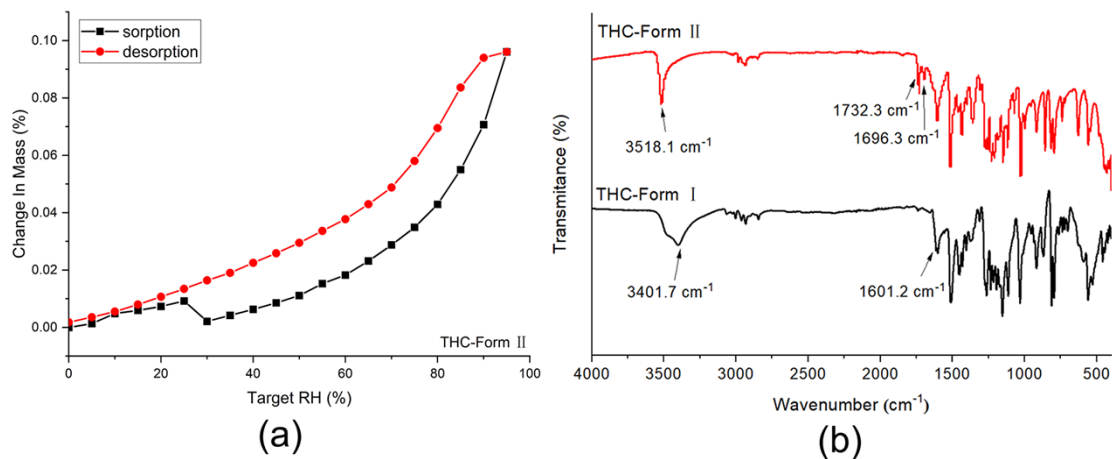

**Fig. S11.** (a) DVS profiles of THC-Form II and (b) Comparison of FT-IR profiles of THC-Form I and II.

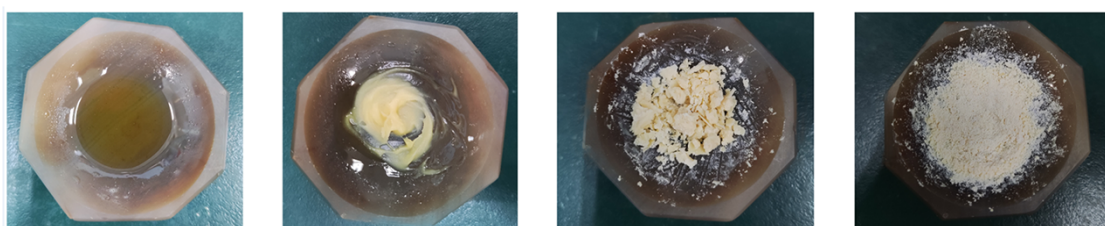

**Fig. S12.** Preparation process of THC-FORM II: The THC was melted by heating to 120°C and stirred continuously at room temperature until a solid sample was completely produced, which was then pulverized with a pestle.

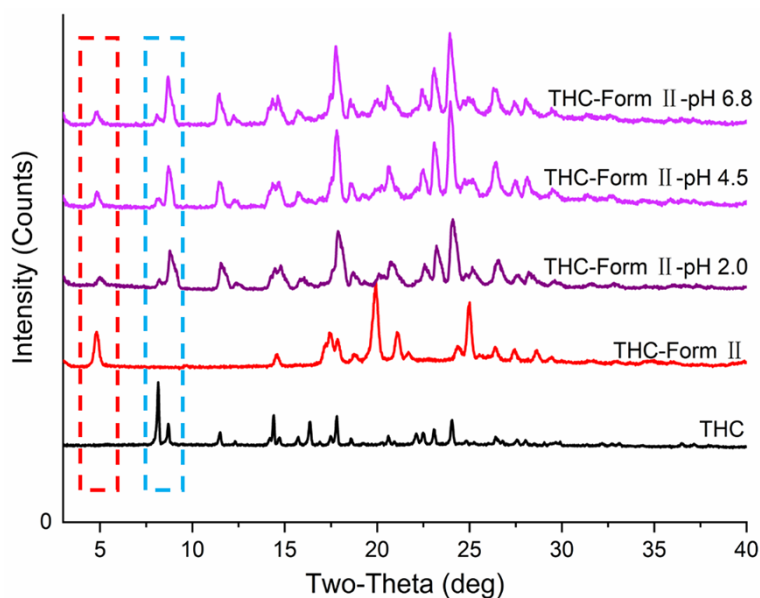

**Fig. S13.** PXRD results of the undissolved solids of THC-Form II after dissolution experiment.

## REFERENCES

1. P. Sanphui, N. R. Goud, U. B. R. Khandavilli and A. Nangia, *Crystal Growth & Design*, 2011, **11**, 4135-4145.
2. I. Sathisaran, D. Devidas Bhatia and S. Vishvanath Dalvi, *International Journal of Pharmaceutics*, 2020, **587**, 119667.
3. I. Sathisaran and S. V. Dalvi, *Crystal Growth & Design*, 2017, **17**, 3974-3988.
4. S. F. Chow, L. Shi, W. W. Ng, K. H. Y. Leung, K. Nagapudi, C. C. Sun and A. H. L. Chow, *Crystal Growth & Design*, 2014, **14**, 5079-5089.
5. J. Pantwalawalkar, H. More, D. Bhange, U. Patil and N. Jadhav, *Journal of Drug Delivery Science and Technology*, 2021, **61**, 102233.
6. C. Caro Garrido, M. Vandooren, K. Robeyns, D. P. Debecker, P. Luis and T. Leyssens, *Journal*, 2024, **14**, 181.
7. N. Rathi, A. Paradkar and V. G. Gaikar, *Journal of Pharmaceutical Sciences*, 2019, **108**, 2505-2516.
8. H. M. Su, H. M. He, Y. Y. Tian, N. Zhao, F. X. Sun, X. M. Zhang, Q. Jiang and G. S. Zhu, *INORGANIC CHEMISTRY COMMUNICATIONS*, 2015, **55**, 92-95.
9. C. Dal Magro, A. E. dos Santos, M. M. Ribas, G. P. S. Aguiar, C. R. B. Volfe, M. L. L. C. Lopes, A. M. Siebel, L. G. Müller, A. J. Bortoluzzi, M. Lanza and J. V. Oliveira, *The Journal of Supercritical Fluids*, 2021, **171**, 105190.
10. S. Chava, S. Gorantla and V. Muppidi, *Patent WO2015052568A3*, 2015.
11. S. Gately and S. Triezenberg, *Patent application no. PCT/US2012/032396*, 2016.
12. K. Kho, D. Nugroho and A. Sugih, *The Journal of Pure and Applied Chemistry Research*, 2018, **7**, 139-147.
13. V. Tejo, K. Jaganathan, K. Sambath, P. Perumal, M. Sevukarajan and M. Aneef, *International Journal of Pharmaceutical Development & Technology*, 2012, **2**, 67-76.
14. M. Singh, S. Takawale, R. Patil, S. Chaudhari, A. Pathan, J. Sangshetti, A. T. Moin, T. Zubair and M. H. Uddin, *bioRxiv*, 2023, DOI: 10.1101/2023.09.08.556876, 2023.2009.2008.556876.
15. R. Shen, J. Zhang and X. Wang, *Journal of Molecular Structure*, 2023, **1284**, 135348.
16. A. Paulazzi, B. Alves, G. Zilli, A. Santos, F. Petry, K. Soares, L. Danielli, J. Pedroso, M. Apel, G. P. Aguiar, A. Siebel, J. Oliveira and L. G Müller, *Inflammopharmacology*, 2022, **30**, 1-15.
17. A. Gunnam and A. K. Nangia, *CrystEngComm*, 2021, **23**, 3398-3410.
18. H. Wang, C. Zheng, F. Tian, Z. Xiao, Z. Sun, L. Lu, W. Dai, Q. Zhang and X. Mei, *Pharmaceutics*, 2024, **17**, 489.
19. B. Bangar, S. Panda and A. Yadav, *Journal of Survey in Fisheries Sciences*, 2023, **10**, 1306-1310.
20. S. N. Wong, S. Hu, W. W. Ng, X. Xu, K. L. Lai, W. Y. T. Lee, A. H. L. Chow, C. C. Sun and S. F. Chow, *Crystal Growth & Design*, 2018, **18**, 5534-5546.
21. R. F. D'Vries, A. Pastrana-Dávila, K. D. Pantoja, J. Ellena, P. H. O. Santiago, G. E. Gomez and M. A. Fernández-Baldo, *ChemistrySelect*, 2024, **9**, e202303368.
22. B. Xuan, S. N. Wong, Y. Zhang, J. Weng, H. H. Y. Tong, C. Wang, C. C. Sun and S. F. Chow, *Crystal Growth & Design*, 2020, **20**, 1951-1960.
